# Supplementary material for: Characterization of the XTH Gene Family: New Insight to the Roles in Soybean Flooding Tolerance
Source: MDPI journal article supplement (doi:10.3390/ijms19092705), 2018-09-11
Supplement: s1 [file s1]

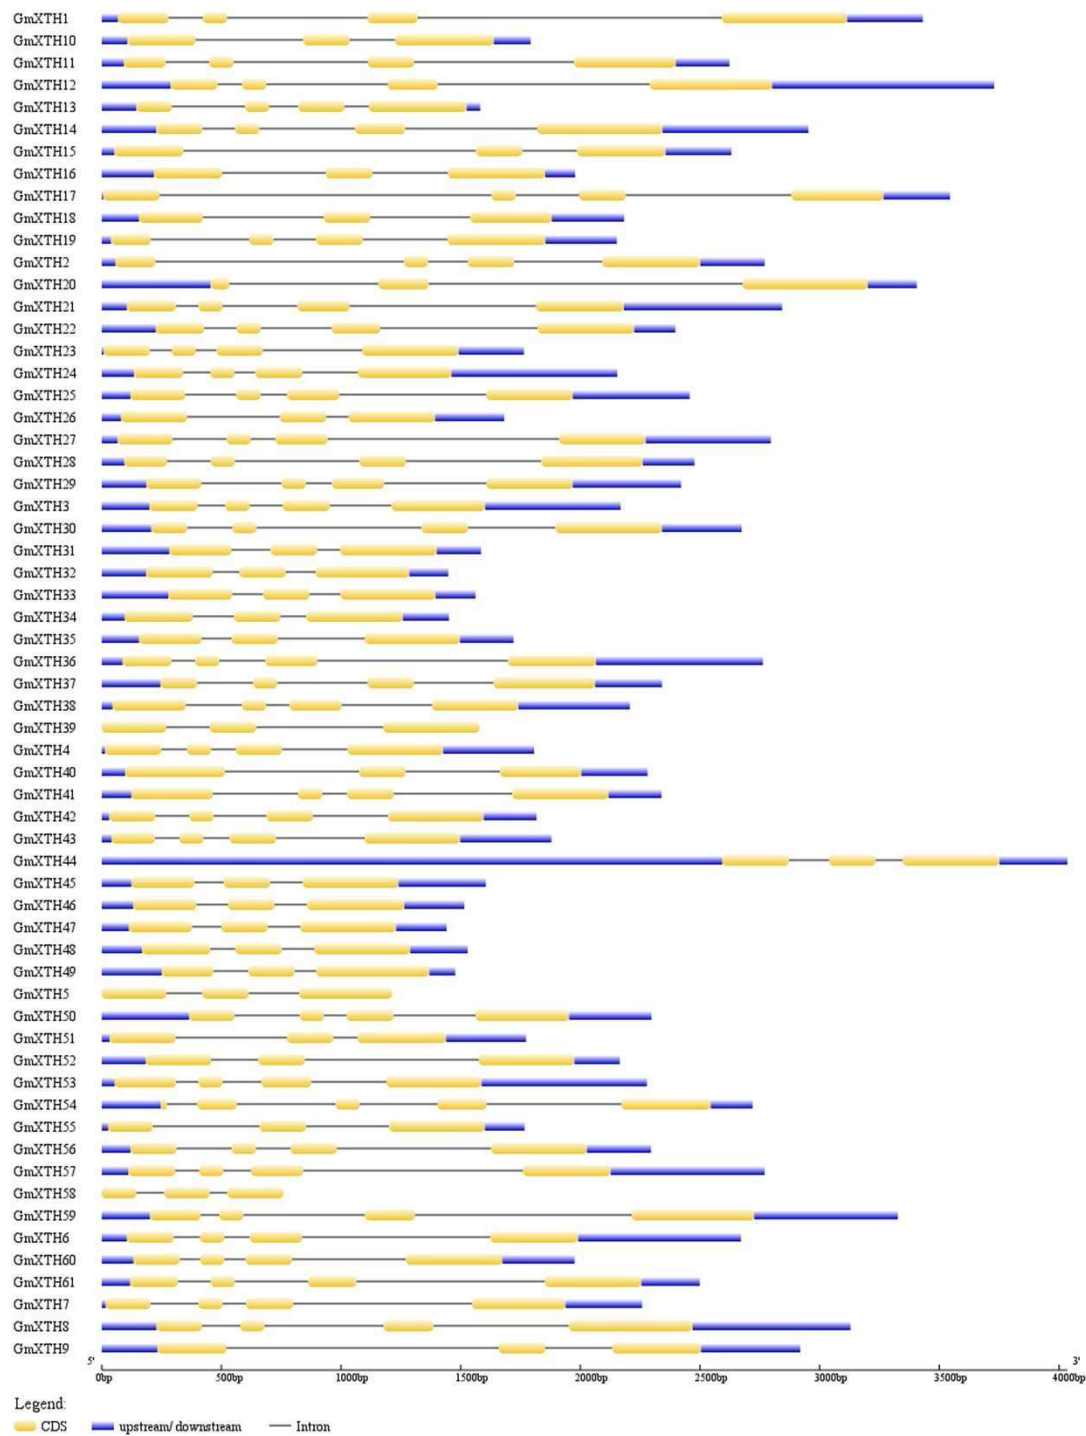

**Supplementary Figure 1.** Exon-intron structure of soybean XTHs. The lengths of the exons and introns of each XTH gene are displayed proportionally. Exons and introns are indicated by yellow rectangles and thin lines, respectively. The untranslated regions (UTRs) are indicated by blue rectangles.
